# Supplementary material for: Effects of intubation timing in patients with COVID-19 throughout the four waves of the pandemic: a matched analysis
Source: PubMed Central journal article supplement — Eur Respir J. 2023 Mar 2;61(3):2201426. doi: 10.1183/13993003.01426-2022 (PMC9686319; doi:10.1183/13993003.01426-2022), 2023-03-02

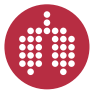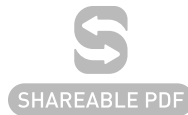

# Effects of intubation timing in patients with COVID-19 throughout the four waves of the pandemic: a matched analysis

Jordi Riera <sup>1,2,6,4</sup>, Enric Barbeta <sup>2,3,4,6,4</sup>, Adrián Tormos <sup>5</sup>, Ricard Mellado-Artigas <sup>2,3</sup>, Adrián Ceccato <sup>6,7</sup>, Anna Motos <sup>2,4</sup>, Laia Fernández-Barat <sup>2,4</sup>, Ricard Ferrer <sup>1</sup>, Darío García-Gasulla <sup>5</sup>, Oscar Peñuelas <sup>8</sup>, José Ángel Lorente <sup>8</sup>, Rosario Menéndez <sup>9</sup>, Oriol Roca <sup>1,2</sup>, Andrea Palomeque <sup>4,10</sup>, Carlos Ferrando <sup>2,3</sup>, Jordi Solé-Violán <sup>11</sup>, Mariana Novo <sup>12</sup>, María Victoria Boado <sup>13</sup>, Luis Tamayo <sup>14</sup>, Ángel Estella <sup>15</sup>, Cristóbal Galban <sup>16</sup>, Josep Trenado <sup>17</sup>, Arturo Huerta <sup>18</sup>, Ana Loza <sup>19</sup>, Luciano Aguilera <sup>20</sup>, José Luís García Garmendia <sup>21</sup>, Carme Barberà <sup>22</sup>, Víctor Gumucio <sup>23,24</sup>, Lorenzo Socías <sup>25</sup>, Nieves Franco <sup>26</sup>, Luis Jorge Valdivia <sup>27</sup>, Pablo Vidal <sup>28</sup>, Víctor Sagredo <sup>29</sup>, Ángela Leonor Ruiz-García <sup>30</sup>, Ignacio Martínez Varela <sup>31</sup>, Juan López <sup>32</sup>, Juan Carlos Pozo <sup>33</sup>, Maite Nieto <sup>34</sup>, José M. Gómez <sup>35</sup>, Aaron Blandino <sup>36</sup>, Manuel Valledor <sup>37</sup>, Elena Bustamante-Munguira <sup>38</sup>, Ángel Sánchez-Miralles <sup>39</sup>, Yhivian Peñasco <sup>40</sup>, José Barberán <sup>41</sup>, Alejandro Ubeda <sup>42</sup>, Rosario Amaya-Villar <sup>43</sup>, María Cruz Martín <sup>44</sup>, Ruth Jorge <sup>45</sup>, Jesús Caballero <sup>46</sup>, Judith Marin <sup>47</sup>, José Manuel Añón <sup>48</sup>, Fernando Suárez Sipmann <sup>49</sup>, Guillermo M. Albaiceta <sup>2,50</sup>, Álvaro Castellanos-Ortega <sup>51</sup>, Berta Adell-Serrano <sup>52</sup>, Mercedes Catalán <sup>53</sup>, Amalia Martínez de la Gándara <sup>54</sup>, Pilar Ricart <sup>55</sup>, Cristina Carbajales <sup>56</sup>, Alejandro Rodríguez <sup>57</sup>, Emili Díaz <sup>5,7</sup>, Mari C. de la Torre <sup>58</sup>, Elena Gallego <sup>59</sup>, Luisa Cantón-Bulnes <sup>60</sup>, Nieves Carbonell <sup>61</sup>, Jessica González <sup>62</sup>, David de Gonzalo-Calvo <sup>2,62</sup>, Ferran Barbé <sup>2,62</sup> and Antoni Torres <sup>2,4,10</sup> on behalf of the CIBERESUCICOVID Consortium <sup>63</sup>

<sup>1</sup>Critical Care Department, Hospital Universitari Vall d'Hebron, SODIR, Vall d'Hebron Institut de Recerca, Barcelona, Spain. <sup>2</sup>CIBER de Enfermedades Respiratorias (CIBERES), Instituto de Salud Carlos III, Madrid, Spain. <sup>3</sup>Surgical Intensive Care Unit, Hospital Clínic de Barcelona, Barcelona, Spain. <sup>4</sup>Institut d'Investigacions Biomèdiques August Pi I Sunyer (IDIBAPS), University of Barcelona (UB), Barcelona, Spain. <sup>5</sup>Barcelona Supercomputing Center (BSC), Barcelona, Spain. <sup>6</sup>Critical Care Center, Parc Taulí Hospital Universitari, Institut d'Investigació i Innovació Parc Taulí I3PT, Sabadell, Spain. <sup>7</sup>Universitat Autònoma de Barcelona (UAB), Barcelona, Spain. <sup>8</sup>Hospital Universitario de Getafe, Universidad Europea, Madrid, Spain. <sup>9</sup>Pneumology Department, Hospital Universitario y Politécnico La Fe/Instituto de Investigación Sanitaria (IIS) La Fe, Valencia, Spain. <sup>10</sup>Respiratory Intensive Care Unit, Hospital Clínic de Barcelona, Barcelona, Spain. <sup>11</sup>Critical Care Department, Hospital Dr Negrín Gran Canaria, Universidad Fernando Pessoa, Las Palmas, Spain. <sup>12</sup>Servei de Medicina Intensiva, Hospital Universitari Son Espases, Palma de Mallorca, Spain. <sup>13</sup>Hospital Universitario de Cruces, Barakaldo, Spain. <sup>14</sup>Critical Care Department, Hospital Universitario Río Hortega de Valladolid, Valladolid, Spain. <sup>15</sup>Departamento Medicina, Facultad Medicina, Universidad de Cádiz, Hospital Universitario de Jerez, Jerez de la Frontera, Spain. <sup>16</sup>Department of Medicine, Complejo Hospitalario Universitario de Santiago (CHUS), Santiago de Compostela, Spain. <sup>17</sup>Servicio de Medicina Intensiva, Hospital Universitario Mútua de Terrassa, Terrassa, Spain. <sup>18</sup>Pulmonary and Critical Care Division, Emergency Department, Clínica Sagrada Família, Barcelona, Spain. <sup>19</sup>Hospital Virgen de Valme, Sevilla, Spain. <sup>20</sup>Hospital de Basurto, Bilbao, Spain. <sup>21</sup>Intensive Care Unit, Hospital San Juan de Dios del Aljarafe, Bormujos, Spain. <sup>22</sup>Hospital Santa Maria, IRBLleida, Lleida, Spain. <sup>23</sup>Department of Intensive Care, Hospital Universitario de Bellvitge, L'Hospitalet de Llobregat, Barcelona, Spain. <sup>24</sup>Bellvitge Biomedical Research Institute (IDIBELL), L'Hospitalet de Llobregat, Barcelona, Spain. <sup>25</sup>Intensive Care Unit, Hospital Son Llàtzer, Palma de Mallorca, Spain. <sup>26</sup>Hospital Universitario de Móstoles, Madrid, Spain. <sup>27</sup>Hospital Universitario de León, León, Spain. <sup>28</sup>Complejo Hospitalario Universitario de Ourense, Ourense, Spain. <sup>29</sup>Hospital Universitario de Salamanca, Salamanca, Spain. <sup>30</sup>Servicio de Microbiología Clínica, Hospital Universitario Príncipe de Asturias, Departamento de Biomedicina y Biotecnología, Universidad de Alcalá de Henares, Madrid, Spain. <sup>31</sup>Critical Care Department, Hospital Universitario Lucus Augusti, Lugo, Spain. <sup>32</sup>Complejo Asistencial Universitario de Palencia, Palencia, Spain. <sup>33</sup>UGC-Medicina Intensiva, Hospital Universitario Reina Sofía, Instituto Maimonides IMIBIC, Córdoba, Spain. <sup>34</sup>Hospital Universitario de Segovia, Segovia, Spain. <sup>35</sup>Hospital General Universitario Gregorio Marañón, Madrid, Spain. <sup>36</sup>Servicio de Medicina Intensiva, Hospital Universitario Ramón y Cajal, Madrid, Spain. <sup>37</sup>Hospital Universitario "San Agustín", Avilés, Spain. <sup>38</sup>Department of Intensive Care Medicine, Hospital Clínico Universitario Valladolid, Valladolid, Spain. <sup>39</sup>Servicio de Medicina Intensiva, Hospital Universitario Sant Joan d'Alacant, Alicante, Spain. <sup>40</sup>Servicio de Medicina Intensiva, Hospital Universitario Marqués de Valdecilla, Santander, Spain. <sup>41</sup>Hospital Universitario HM Montepríncipe, Universidad San Pablo-CEU, Madrid, Spain. <sup>42</sup>Servicio de Medicina Intensiva, Hospital Punta de Europa, Algeciras, Spain. <sup>43</sup>Intensive Care Clinical Unit, Hospital Universitario Virgen de Rocío, Sevilla, Spain. <sup>44</sup>Hospital Universitario Torrejón, Universidad Francisco de Vitoria, Madrid, Spain. <sup>45</sup>Intensive Care Department, Hospital Nuestra Señora de Gracia, Zaragoza, Spain. <sup>46</sup>Critical Care Department, Hospital Universitari Arnau de Vilanova, IRBLleida, Lleida, Spain. <sup>47</sup>Critical Care Department, Hospital del Mar-IMIM, Barcelona, Spain. <sup>48</sup>Hospital Universitario la Paz, Madrid, Spain. <sup>49</sup>Intensive Care Unit, Hospital Universitario La Princesa, Madrid, Spain. <sup>50</sup>Departamento de Biología Funcional, Instituto Universitario de Oncología del Principado de Asturias, Universidad de Oviedo, Instituto de Investigación Sanitaria del Principado de Asturias, Hospital Central de Asturias, Oviedo, Spain. <sup>51</sup>Hospital Universitario y Politécnico la Fe, Valencia, Spain. <sup>52</sup>Hospital de Tortosa Verge de la Cinta, Tortosa, Spain. <sup>53</sup>Department of Intensive Care Medicine, Hospital Universitario 12 de Octubre, Madrid, Spain. <sup>54</sup>Hospital

Universitario Infanta Leonor, Madrid, Spain. <sup>55</sup>Servei de Medicina Intensiva, Hospital Universitari Germans Trias, Badalona, Spain. <sup>56</sup>Intensive Care Unit, Hospital Álvaro Cunqueiro, Vigo, Spain. <sup>57</sup>Hospital Universitari Joan XXIII de Tarragona, Tarragona, Spain. <sup>58</sup>Hospital de Mataró de Barcelona, Barcelona, Spain. <sup>59</sup>Unidad de Cuidados Intensivos, Hospital Universitario San Pedro de Alcántara, Cáceres, Spain. <sup>60</sup>Unidad de Cuidados Intensivos, Hospital Virgen Macarena, Sevilla, Spain. <sup>61</sup>Intensive Care Unit, Hospital Clínico y Universitario de Valencia, Valencia, Spain. <sup>62</sup>Translational Research in Respiratory Medicine, Respiratory Department, Hospital Universitari Aranu de Vilanova and Santa Maria, IRBLleida, Lleida, Spain. <sup>63</sup>A list of individual members of the CIBERESUCICOVID group is provided in the Acknowledgements. <sup>64</sup>These authors contributed equally to this work.

Corresponding author: Antoni Torres ([atorres@clinic.cat](mailto:atorres@clinic.cat))

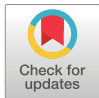

Shareable abstract (@ERSpublications)

**In patients who require intubation and invasive mechanical ventilation due to COVID-19-associated acute respiratory failure, delays in implementation may increase the risk of mortality** <https://bit.ly/3fZLCIP>

**Cite this article as:** Riera J, Barbeta E, Tormos A, *et al.* Effects of intubation timing in patients with COVID-19 throughout the four waves of the pandemic: a matched analysis. *Eur Respir J* 2023; 61: 2201426 [DOI: 10.1183/13993003.01426-2022].

This single-page version can be shared freely online.

Copyright ©The authors 2023.

This version is distributed under the terms of the Creative Commons Attribution Non-Commercial Licence 4.0. For commercial reproduction rights and permissions contact [permissions@ersnet.org](mailto:permissions@ersnet.org)

Received: 22 July 2022  
Accepted: 5 Oct 2022

## Abstract

**Background** The primary aim of our study was to investigate the association between intubation timing and hospital mortality in critically ill patients with coronavirus disease 2019 (COVID-19)-associated respiratory failure. We also analysed both the impact of such timing throughout the first four pandemic waves and the influence of prior noninvasive respiratory support on outcomes.

**Methods** This is a secondary analysis of a multicentre, observational and prospective cohort study that included all consecutive patients undergoing invasive mechanical ventilation due to COVID-19 from across 58 Spanish intensive care units (ICUs) participating in the CIBERESUCICOVID project. The study period was between 29 February 2020 and 31 August 2021. Early intubation was defined as that occurring within the first 24 h of ICU admission. Propensity score matching was used to achieve a balance across baseline variables between the early intubation cohort and those patients who were intubated after the first 24 h of ICU admission. Differences in outcomes between early and delayed intubation were also assessed. We performed sensitivity analyses to consider a different time-point (48 h from ICU admission) for early and delayed intubation.

**Results** Of the 2725 patients who received invasive mechanical ventilation, a total of 614 matched patients were included in the analysis (307 for each group). In the unmatched population, there were no differences in mortality between the early and delayed groups. After propensity score matching, patients with delayed intubation presented higher hospital mortality (27.3% *versus* 37.1%;  $p=0.01$ ), ICU mortality (25.7% *versus* 36.1%;  $p=0.007$ ) and 90-day mortality (30.9% *versus* 40.2%;  $p=0.02$ ) compared with the early intubation group. Very similar findings were observed when we used a 48-h time-point for early or delayed intubation. The use of early intubation decreased after the first wave of the pandemic (72%, 49%, 46% and 45% in the first, second, third and fourth waves, respectively; first *versus* second, third and fourth waves  $p<0.001$ ). In both the main and sensitivity analyses, hospital mortality was lower in patients receiving high-flow nasal cannula (HFNC) ( $n=294$ ) who were intubated earlier. The subgroup of patients undergoing noninvasive ventilation ( $n=214$ ) before intubation showed higher mortality when delayed intubation was set as that occurring after 48 h from ICU admission, but not when after 24 h.

**Conclusions** In patients with COVID-19 requiring invasive mechanical ventilation, delayed intubation was associated with a higher risk of hospital mortality. The use of early intubation significantly decreased throughout the course of the pandemic. Benefits of such an approach occurred more notably in patients who had received HFNC.

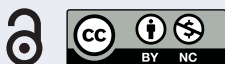

Supplement: ERJ-01426-2022.Shareable.pdf [file ERJ-01426-2022.Shareable.pdf]
