# Supplementary material for: Effects of intubation timing in patients with COVID-19 throughout the four waves of the pandemic: a matched analysis
Source: PubMed Central journal article supplement — Eur Respir J. 2023 Mar 2;61(3):2201426. doi: 10.1183/13993003.01426-2022 (PMC9686319; doi:10.1183/13993003.01426-2022), 2023-03-02
Supplement: ERJ-01426-2022.Supplement.pdf [file ERJ-01426-2022.Supplement.pdf]

## **SUPPLEMENTARY ONLINE CONTENT**

**Effects of intubation timing in patients with COVID-19 throughout the four waves of the pandemic: a matched analysis**

**Supplementary Table S1**

---

| <b>Site and Region</b>                                                          |
|---------------------------------------------------------------------------------|
| HOSPITAL UNIVERSITARIO DE GRAN CANARIA DR. NEGRÍN / Palmas de Gran Canaria, Las |
| HOSPITAL UNIVERSITARI SON ESPASES / Palma de Mallorca                           |
| HOSPITAL UNIVERSITARI SAGRAT COR / Barcelona                                    |
| HOSPITAL UNIVERSITARIO DE CRUCES / Barakaldo                                    |
| HOSPITAL UNIVERSITARIO RIO HORTEGA / Valladolid                                 |
| HOSPITAL UNIVERSITARIO DE JEREZ DE LA FRONTERA / Jerez de la Frontera           |
| HOSPITAL CLINICO UNIVERSITARIO DE SANTIAGO / Santiago de Compostela             |
| HOSPITAL UNIVERSITARI MÚTUA DE TERRASSA / Terrassa                              |
| CLÍNICA SAGRADA FAMÍLIA / Barcelona                                             |
| HOSPITAL VIRGEN DE VALME / Sevilla                                              |
| HOSPITAL DE BASURTO / Bilbao                                                    |
| HOSPITAL SAN JUAN DE DIOS DEL ALJARAFE / Bormujos                               |
| HOSPITAL SANTA MARIA / Lleida                                                   |
| HOSPITAL CLÍNIC DE BARCELONA / Barcelona                                        |
| HOSPITAL UNIVERSITARI DE BELLVITGE / Hospitalet de Llobregat, L'                |
| HOSPITAL SON LLATZER / Palma de Mallorca                                        |
| HOSPITAL DE LEÓN / León                                                         |
| COMPLEXO HOSPITALARIO UNIVERSITARIO DE OURENSE / Ourense                        |
| HOSPITAL UNIVERSITARIO DE SALAMANCA / Salamanca                                 |
| HOSPITAL UNIVERSITARIO PRÍNCIPE DE ASTURIAS / Alcalá de Henares                 |
| HOSPITAL UNIVERSITARIO LUCUS AUGUSTI / Lugo                                     |
| COMPLEJO ASISTENCIAL UNIVERSITARIO DE PALENCIA / Palencia                       |
| HOSPITAL UNIVERSITARIO REINA SOFÍA / Córdoba                                    |
| HOSPITAL GENERAL DE SEGOVIA / Segovia                                           |
| HOSPITAL GENERAL UNIVERSITARIO GREGORIO MARAÑÓN / Madrid                        |
| HOSPITAL RAMÓN Y CAJAL / Madrid                                                 |
| HM UNIVERSITARIO PUERTA DEL SUR / Móstoles                                      |
| HOSPITAL UNIVERSITARIO "SAN AGUSTÍN" / Avilés                                   |
| HOSPITAL CLÍNICO UNIVERSITARIO DE VALLADOLID / Valladolid                       |
| HOSPITAL UNIVERSITARIO SAN JUAN DE ALICANTE / Sant Joan d'Alacant               |
| HOSPITAL UNIVERSITARIO MARQUÉS DE VALDECILLA / Santander                        |
| HOSPITAL UNIVERSITARIO HM NUEVO BELEN / Madrid                                  |
| HOSPITAL PUNTA DE EUROPA / Algeciras                                            |
| HOSPITAL UNIVERSITARIO HM MONTEPRÍNCIPE / Boadilla del Monte                    |
| HOSPITAL UNIVERSITARIO VIRGEN DEL ROCÍO / Sevilla                               |
| HOSPITAL UNIVERSITARIO DE TORREJÓN / Torrejón de Ardoz                          |
| HOSPITAL NUESTRA SEÑORA DE GRACIA / Zaragoza                                    |
| HOSPITAL UNIVERSITARI ARNAU DE VILANOVA DE LLEIDA. / Lleida                     |
| HOSPITAL UNIVERSITARIO MADRID SANCHINARRO / Madrid                              |
| HOSPITAL DEL MAR. / Barcelona                                                   |
| HOSPITAL UNIVERSITARIO DE GETAFE / Getafe                                       |
| HOSPITAL UNIVERSITARIO LA PAZ / Madrid                                          |
| HOSPITAL UNIVERSITARIO DE LA PRINCESA / Madrid                                  |
| HOSPITAL UNIVERSITARIO HM TORRELODONES / Torrelorones                           |
| HOSPITAL UNIVERSITARIO CENTRAL DE ASTURIAS / Oviedo                             |
| HOSPITAL UNIVERSITARIO Y POLITÉCNICO LA FE / Valencia                           |
| HOSPITAL DE TORTOSA VERGE DE LA CINTA / Tortosa                                 |

---

HOSPITAL UNIVERSITARIO 12 DE OCTUBRE / Madrid  
HOSPITAL UNIVERSITARI VALL D'HEBRON / Barcelona  
HOSPITAL UNIVERSITARIO INFANTA LEONOR / Madrid  
HOSPITAL UNIVERSITARI GERMANS TRIAS I PUJOL DE BADALONA / Badalona  
HOSPITAL UNIVERSITARIO ALVARO CUNQUEIRO / Vigo  
HOSPITAL UNIVERSITARI JOAN XXIII DE TARRAGONA / Tarragona  
HOSPITAL DE SABADELL / Sabadell  
HOSPITAL DE MATARÓ / Mataró  
HOSPITAL UNIVERSITARIO SAN PEDRO DE ALCÁNTARA / Cáceres  
HOSPITAL VIRGEN MACARENA / Sevilla  
HOSPITAL CLÍNICO UNIVERSITARIO DE VALENCIA / Valencia

---

### Supplementary Table S2

Periods that define the first, second, third and fourth waves in Spain.

| <b>Wave</b> | <b>Begin Date of Wave</b> | <b>End Date of Wave</b> |
|-------------|---------------------------|-------------------------|
| Wave 1      | 02/29/2020                | 06/30/2020              |
| Wave 2      | 06/30/2020                | 12/10/2020              |
| Wave 3      | 12/10/2020                | 03/20/2021              |
| Wave 4      | 03/20/2021                | 06/20/2021              |

**Supplementary Table S3** Characteristics and outcomes of critically ill patients with COVID-19 according to intubation timing (48-hour timepoint analysis).

| Variables                                               | Before PS matching (N = 2725) |                              |                  | After PS matching (N = 458) |                              |                |
|---------------------------------------------------------|-------------------------------|------------------------------|------------------|-----------------------------|------------------------------|----------------|
|                                                         | Early intubation (n = 2164)   | Delayed intubation (n = 561) | <i>p</i> value   | Early intubation (n = 229)  | Delayed intubation (n = 229) | <i>p</i> value |
| Age, years, median, (IQR)                               | 65 (57; 72)                   | 64 (55;70)                   | <b>0.007</b>     | 63 (56; 71)                 | 64 (56; 71)                  | 0.85           |
| Sex, female, n (%)                                      | 630 (29.11)                   | 154 (27.45)                  | 0.46             | 65 (28.3)                   | 66 (28.8)                    | 1              |
| BMI, Kg/m <sup>2</sup> , median, (IQR)                  | 28.7 (25.9; 32.2)             | 28.7 (25.9; 31.9)            | 0.70             | 29.3 (26.6; 33.6)           | 29.2 (26.2; 32)              | 0.16           |
| Hypertension, n (%)                                     | 1135 (52.4)                   | 299 (53.2)                   | 0.74             | 129 (56.3)                  | 121 (52.8)                   | 0.51           |
| Diabetes mellitus, n (%)                                | 537 (24.8)                    | 144 (25.6)                   | 0.70             | 60 (26.2)                   | 60 (26.2)                    | 1              |
| Chronic cardiac failure, n (%)                          | 272 (12.5)                    | 70 (12.4)                    | 1                | 33 (14.4)                   | 31 (13.5)                    | 0.89           |
| COPD, n (%)                                             | 205 (9.4)                     | 57 (10.1)                    | 0.63             | 27 (11.7)                   | 27 (11.7)                    | 1              |
| Immunodepression, n (%)                                 | 373 (17.2)                    | 150 (26.7)                   | <b>&lt;0.001</b> | 44 (19.2)                   | 40 (17.4)                    | 0.71           |
| Received corticosteroids, n (%)                         | 1824(85.1)                    | 511 (92)                     | <b>&lt;0.001</b> | 213 (93)                    | 211 (92.1)                   | 0.85           |
| <b>Clinical characteristics at hospital admission</b>   |                               |                              |                  |                             |                              |                |
| PaO <sub>2</sub> /FiO <sub>2</sub> , median, (IQR)      | 221.4 (136.2; 282.8)          | 207.1 (111.2; 274.7)         | <b>0.04</b>      | 202.3 (122; 271.4)          | 195.2 (114; 271.4)           | 0.97           |
| Respiratory rate, respiration per minute, median, (IQR) | 24 (20; 30)                   | 25 (20; 30)                  | 0.12             | 25 (20; 31)                 | 26 (20; 32)                  | 0.29           |
| PaCO <sub>2</sub> , mmHg, median, (IQR)                 | 34 (30; 38)                   | 34 (30.1; 37.4)              | 0.93             | 34 (30; 37.3)               | 33 (30; 37.1)                | 0.40           |
| pH, median, (IQR)                                       | 7.45 (7.41; 7.47)             | 7.45 (7.41; 7.47)            | 0.36             | 7.45 (7.42; 7.48)           | 7.45 (7.42; 7.48)            | 0.90           |
| HFNC, n (%)*                                            | 795 (36.7)                    | 287 (51.1)                   | <b>&lt;0.001</b> | 94 (41)                     | 102 (44.5)                   | 0.50           |

|                                                                   |                   |                   |                  |                   |                  |                  |
|-------------------------------------------------------------------|-------------------|-------------------|------------------|-------------------|------------------|------------------|
| NIV n (%)**                                                       | 727 (34.2)        | 236 (42.3)        | <b>&lt;0.001</b> | 76 (33.6)         | 113 (49.5)       | <b>0.001</b>     |
| CRP, mg/dL, median, (IQR)                                         | 12.7 (6.9; 20.6)  | 12 (6.6; 21.5)    | 0.76             | 13.3 (7.8; 22.1)  | 14.7 (8.3; 21.2) | 0.72             |
| Lymphocyte count, 10 <sup>9</sup> cells/L, median, (IQR)          | 0.8 (0.58; 1.1)   | 0.8 (0.59; 1.08)  | 0.61             | 0.79 (0.58; 1.04) | 0.8 (0.6; 1.03)  | 0.69             |
| Platelets, 10 <sup>9</sup> cells/L, median, (IQR)*                | 180 (144; 234)    | 184 (139; 238)    | 0.89             | 181 (143; 231)    | 190 (148; 246)   | 0.14             |
| D-dimer, mg/L, median, (IQR)                                      | 0.66 (0.39; 1.13) | 0.65 (0.37; 1.16) | 0.63             | 0.66 (0.38; 1.1)  | 0.66 (0.4; 1.35) | 0.40             |
| Creatinine, mg/dL, median, (IQR)                                  | 0.97 (0.8; 1.2)   | 0.96 (0.7; 1.2)   | 0.99             | 0.96 (0.8; 1.27)  | 0.92 (0.7; 1.17) | 0.13             |
| Lactate, mg/dL, median, (IQR)                                     | 13.5 (9.9; 17.1)  | 12.6 (9.1; 17.1)  | 0.37             | 13.51 (9.9; 16.2) | 11.71 (9; 15)    | 0.09             |
| <b>Disease chronology</b>                                         |                   |                   |                  |                   |                  |                  |
| Time since symptom onset to ICU admission, days, median, (IQR)    | 9 (7; 12)         | 8 (6; 11)         | <b>&lt;0.001</b> | 8 (6; 11)         | 8 (7; 11)        | 0.63             |
| Patients spending >2 days in hospital before ICU admission, n (%) | 1165 (53.86)      | 196 (34.94)       | <b>&lt;0.001</b> | 67 (29.2)         | 64 (27.957)      | 0.83             |
| Time since symptom onset to IMV, days, median, (IQR)              | 10 (7; 12)        | 12 (10; 16)       | <b>&lt;0.001</b> | 9 (7; 11)         | 12 (10; 16)      | <b>&lt;0.001</b> |
| Time since hospital admission to IMV, days, median, (IQR)         | 3 (2; 5)          | 5 (3; 9)          | <b>&lt;0.001</b> | 2 (1; 3)          | 5 (3; 8)         | <b>&lt;0.001</b> |
| Time since ICU admission to IMV, days, median, (IQR)              | 0 (0; 0)          | 3 (2; 5)          | <b>&lt;0.001</b> | 0 (0; 0)          | 3 (2; 5)         | <b>&lt;0.001</b> |
| <b>Waves</b>                                                      |                   |                   |                  |                   |                  |                  |
| 1 <sup>st</sup> wave, n (%)                                       | 1382 (63.8)       | 196 (34.9)        | <b>&lt;0.001</b> | 117 (51)          | 93 (40.6)        | <b>0.03</b>      |
| 2 <sup>nd</sup> wave, n (%)                                       | 524 (24.2)        | 228 (40.6)        | <b>&lt;0.001</b> | 63 (27.5)         | 102 (44.5)       | <b>&lt;0.001</b> |
| 3 <sup>rd</sup> wave, n (%)                                       | 198 (9.1)         | 98 (17.4)         | <b>&lt;0.001</b> | 43 (18.7)         | 32 (13.9)        | 0.20             |
| 4 <sup>th</sup> wave, n (%)                                       | 30 (1.3)          | 14 (2.5)          | 0.08             | 6 (2.6)           | 2 (0.87)         | 0.28             |
| <b>Outcomes</b>                                                   |                   |                   |                  |                   |                  |                  |
| IMV days, median, (IQR)†                                          | 13 (8; 29)        | 17 (8; 29)        | 0.21             | 13 (8; 24)        | 18 (9; 31.5)     | <b>0.01</b>      |
| ICU days, median, (IQR)†                                          | 18 (12; 36)       | 28 (18; 43)       | <b>&lt;0.001</b> | 17 (11; 32)       | 27 (16; 44)      | <b>&lt;0.001</b> |

|                               |              |             |             |            |              |                  |
|-------------------------------|--------------|-------------|-------------|------------|--------------|------------------|
| Prone position, n (%)         | 1638 (76.04) | 451 (80.68) | <b>0.02</b> | 167 (72.9) | 192 (84.2)   | <b>0.004</b>     |
| Neuromuscular blockade, n (%) | 1839 (85.06) | 463 (82.97) | 0.23        | 189 (82.5) | 198 (86.4)   | 0.30             |
| ECMO, n (%)                   | 35 (1.6)     | 23 (4.11)   | <b>0.01</b> | 6 (2.6)    | 11 (4.8)     | 0.32             |
| ICU mortality, n (%)          | 740 (34.2)   | 218 (38.8)  | <b>0.04</b> | 62 (27.07) | 94 (41.05.1) | <b>0.002</b>     |
| Hospital mortality, n (%)     | 792 (36.6)   | 233 (41.5)  | <b>0.03</b> | 62 (27.07) | 99 (43.23)   | <b>&lt;0.001</b> |
| 90-day mortality, n (%)       | 784 (39.8)   | 233 (45)    | <b>0.03</b> | 62 (30.2)  | 97 (44.5)    | <b>0.003</b>     |

Early intubation is considered as  $\leq 48$  hours and delayed intubation, as  $> 48$  hours from ICU admission.

Definition of abbreviations: BMI: body mass index; COPD: chronic obstructive pulmonary disease; CRP: C reactive protein; ECMO: extracorporeal membrane oxygenation; HFNC: high-flow nasal cannula; ICU: intensive care unit; IMV: invasive mechanical ventilation; IQR: interquartile range; NIV: non-invasive ventilation; PaCO<sub>2</sub>: partial pressure of CO<sub>2</sub> in the arterial blood; and PS: propensity score. Percentages calculated with non-missing data only.

Variables used to perform PS matching included age, sex, respiratory rate at hospital admission, PaO<sub>2</sub>/FIO<sub>2</sub> at hospital admission (categorised as  $>300$  mmHg;  $200$  mmHg  $< PaO_2/FIO_2 \leq 300$  mmHg;  $100$  mmHg  $< PaO_2/FiO_2 \leq 200$  mmHg;  $PaO_2/FIO_2 \leq 100$  mmHg), days between hospital and ICU admission (categorised as  $\leq$  or  $> 2$  days), chronic immunosuppression, corticosteroid treatment and COVID-19 wave. After excluding patients with missing values, we had a population of n=1117. Table 43 in supplemental material shows standardised mean differences in baseline covariates from the matched population. \*HFNC with or without NIV; \*\* NIV with or without HFNC. \* and \*\* received at least one session of NIV and/or HFNC since hospital admission before intubation. † Analysed only in survivors. Boldface entries indicate statistical significance.

### Supplementary Table S4

Distribution of baseline characteristics from the matched sample of patients with severe COVID-19 undergoing invasive mechanical ventilation.

| Covariate                                                  | SMD early vs delayed general population | SMD early vs delayed HFNC | SMD early vs delayed NIV+/- HFNC |
|------------------------------------------------------------|-----------------------------------------|---------------------------|----------------------------------|
| Age                                                        | 0.04                                    | 0.16                      | 0.04                             |
| Sex                                                        | 0.09                                    | 0.03                      | 0.13                             |
| BMI                                                        | 0.13                                    | 0.02                      | <b>0.27</b>                      |
| Hypertension                                               | 0.026                                   | 0.16                      | 0.09                             |
| Diabetes mellitus                                          | 0.04                                    | 0                         | 0                                |
| Chronic cardiac failure                                    | 0.07                                    | 0.06                      | 0.02                             |
| COPD                                                       | 0.03                                    | 0.04                      | 0.02                             |
| Immunodepression                                           | 0.07                                    | 0.02                      | 0.07                             |
| Received corticosteroids                                   | 0.07                                    | 0.02                      | 0.09                             |
| <b>Clinical characteristics at hospital admission</b>      |                                         |                           |                                  |
| PaO <sub>2</sub> /F <sub>I</sub> O <sub>2</sub>            | 0.002                                   | 0.11                      | 0.01                             |
| Respiratory rate                                           | 0.06                                    | 0.01                      | 0.03                             |
| PaCO <sub>2</sub>                                          | 0.03                                    | 0.11                      | <b>0.2</b>                       |
| pH                                                         | 0.07                                    | 0.07                      | 0.19                             |
| HFNC                                                       | <b>0.64</b>                             | -                         | -                                |
| NIV                                                        | <b>0.25</b>                             | -                         | -                                |
| CRP                                                        | 0.07                                    | 0.16                      | <b>0.21</b>                      |
| Lymphocyte count                                           | 0.02                                    | 0.02                      | <b>0.21</b>                      |
| Platelets                                                  | 0.11                                    | 0.12                      | 0.15                             |
| D-dimer                                                    | 0.09                                    | 0.06                      | 0.06                             |
| Creatinine                                                 | 0.03                                    | 0.01                      | 0.14                             |
| Lactate                                                    | 0.04                                    | 0.12                      | 0.04                             |
| <b>Disease chronology</b>                                  |                                         |                           |                                  |
| Time since symptom onset to ICU admission                  | 0.001                                   | 0.16                      | 0.15                             |
| Patients spending >2 days in hospital before ICU admission | 0.05                                    | 0.02                      | 0.05                             |
| Time since symptom onset to IMV                            | 0.1                                     | <b>0.27</b>               | 0.02                             |
| Time since hospital admission to IMV                       | <b>0.21</b>                             | <b>0.48</b>               | <b>0.40</b>                      |
| Time since ICU admission to IMV                            | <b>0.26</b>                             | <b>1.04</b>               | <b>1.5</b>                       |
| <b>Waves</b>                                               |                                         |                           |                                  |
| 1st wave                                                   | 0.03                                    | 0.15                      | 0.12                             |
| 2nd wave                                                   | 0.13                                    | 0.16                      | <b>0.22</b>                      |
| 3rd wave                                                   | 0.11                                    | 0                         | 0.10                             |
| 4th wave                                                   | 0.09                                    | 0.04                      | 0.13                             |

Early intubation is considered as  $\leq 24$  hours and delayed intubation, as  $> 24$  hours from ICU admission. Definition of abbreviations: BMI: body mass index; COPD: chronic obstructive pulmonary disease; CRP: C reactive protein; ECMO: extracorporeal membrane oxygenation; HFNC: high-flow nasal cannula; ICU: intensive care unit; IMV: invasive mechanical ventilation; IQR: interquartile range; NIV: non-invasive ventilation; PaCO<sub>2</sub>: partial pressure of CO<sub>2</sub> in the arterial blood; PS: propensity score; SMD: standardised mean differences. Boldface entries indicate significant SMD.

## Supplementary Table S5

Distribution of baseline characteristics from the matched sample of patients with severe COVID-19 undergoing invasive mechanical ventilation (48-hour timepoint analysis).

| Covariate                                                  | SMD early vs delayed general population | SMD early vs delayed HFNC | SMD early vs delayed NIV+/- HFNC |
|------------------------------------------------------------|-----------------------------------------|---------------------------|----------------------------------|
| Age                                                        | 0.06                                    | 0.20                      | 0.11                             |
| Sex                                                        | 0.08                                    | 0.05                      | 0.05                             |
| BMI                                                        | 0.16                                    | 0.03                      | <b>0.49</b>                      |
| Hypertension                                               | 0.07                                    | 0.03                      | 0.01                             |
| Diabetes mellitus                                          | 0.000                                   | 0.000                     | 0.07                             |
| Chronic cardiac failure                                    | 0.025                                   | 0.05                      | 0.07                             |
| COPD                                                       | 0.000                                   | 0.03                      | <b>0.21</b>                      |
| Immunodepression                                           | 0.04                                    | 0.000                     | 0.000                            |
| Received corticosteroids                                   | 0.03                                    | 0.03                      | 0.03                             |
| <b>Clinical characteristics at hospital admission</b>      |                                         |                           |                                  |
| PaO <sub>2</sub> /F <sub>I</sub> O <sub>2</sub>            | 0.003                                   | 0.17                      | 0.03                             |
| Respiratory rate                                           | 0.08                                    | <b>0.22</b>               | 0.07                             |
| PaCO <sub>2</sub>                                          | 0.07                                    | 0.08                      | 0.09                             |
| pH                                                         | 0.02                                    | 0.04                      | 0.12                             |
| HFNC                                                       | 0.07                                    | -                         | -                                |
| NIV                                                        | <b>0.33</b>                             | -                         | -                                |
| CRP                                                        | 0.01                                    | 0.005                     | 0.07                             |
| Lymphocyte count                                           | 0.12                                    | 0.15                      | 0.08                             |
| Platelets                                                  | 0.08                                    | 0.09                      | 0.02                             |
| D-dimer                                                    | 0.14                                    | 0.06                      | 0.13                             |
| Creatinine                                                 | 0.001                                   | 0.12                      | 0.05                             |
| Lactate                                                    | 0.15                                    | 0.06                      | <b>0.32</b>                      |
| <b>Disease chronology</b>                                  |                                         |                           |                                  |
| Time since symptom onset to ICU admission                  | 0.10                                    | 0.02                      | 0.17                             |
| Patients spending >2 days in hospital before ICU admission | 0.02                                    | 0.08                      | 0.03                             |
| Time since symptom onset to IMV                            | 0.19                                    | <b>0.52</b>               | 0.03                             |
| Time since hospital admission to IMV                       | <b>0.29</b>                             | <b>0.76</b>               | <b>1.04</b>                      |
| Time since ICU admission to IMV                            | <b>0.32</b>                             | <b>1.31</b>               | <b>1.74</b>                      |
| <b>Waves</b>                                               |                                         |                           |                                  |
| 1st wave                                                   | 0.2                                     | <b>0.21</b>               | 0.17                             |
| 2nd wave                                                   | <b>0.36</b>                             | 0.20                      | <b>0.35</b>                      |
| 3rd wave                                                   | 0.11                                    | 0                         | 0.18                             |
| 4th wave                                                   | 0.09                                    | 0.05                      | 0.18                             |

Early intubation is considered as  $\leq 48$  hours and delayed intubation, as  $> 48$  hours from ICU admission. Definition of abbreviations: BMI: body mass index; COPD: chronic obstructive pulmonary disease; CRP: C-reactive protein; ECMO: extracorporeal membrane oxygenation; HFNC: high-flow nasal cannula; ICU: intensive care unit; IMV: invasive mechanical ventilation; IQR: interquartile range; NIV: non-invasive ventilation; PaCO<sub>2</sub>: partial pressure of

CO<sub>2</sub> in the arterial blood; PS: propensity score; SMD: standardised mean differences. Boldface entries indicate significant SMD.

## Supplementary Table S6

Changes throughout the pandemic as it relates to the use of non-invasive respiratory support therapies before invasive mechanical ventilation, time to intubation, and outcomes.

| Variables                                                 | First wave<br>N= 1578 |                    | Second wave<br>N= 752 |                   | Third wave<br>N= 296 |                   | Fourth wave<br>N = 44 |                   |
|-----------------------------------------------------------|-----------------------|--------------------|-----------------------|-------------------|----------------------|-------------------|-----------------------|-------------------|
|                                                           | Early<br>n =1148      | Delayed<br>n = 430 | Early<br>n =383       | Delayed<br>n =369 | Early<br>n = 139     | Delayed<br>n =157 | Early<br>n = 20       | Delayed<br>n = 24 |
| Age, years, median, (IQR)                                 | 65 (57; 72)<br>¶      | 63 (54; 69)        | 65 (57; 73)           | 64 (56; 72)       | 68 (60; 72)<br>¶     | 64 (56; 70)       | 67 (58; 70)           | 64 (52; 71)       |
| HFNC, n (%)*                                              | 492 (55.9)<br>¶       | 331 (88.7)         | 217 (71.6)<br>¶       | 341 (91.6)        | 97 (72.3) ¶          | 147 (94.2)        | 18 (90)               | 24 (100)          |
| NIV, n (%)**                                              | 413 (14.7)            | 153 (36)           | 118 (32.5)            | 136 (35.5)        | 48 (34.5)            | 66 (42.5)         | 8 (40)                | 8 (33.3)          |
| Time since symptom onset to IMV, days, median, (IQR)      | 10 (8; 13)            | 10 (8; 13)         | 9 (7; 12) ¶           | 11 (9; 15)        | 9 (7; 11) ¶          | 11 (8; 14)        | 11.5 (8; 13.5)        | 12 (9.75; 15)     |
| Time since hospital admission to IMV, days, median, (IQR) | 3 (2; 5)              | 3 (2; 5)           | 3 (2; 5) ¶            | 4 (3; 7)          | 3 (2; 4) ¶           | 4 (2; 7)          | 4 (2; 7.2)            | 3.5 (2.7.2)       |
| Time since ICU admission to IMV, days, median, (IQR)      | 0 (0; 0)<br>¶         | 1 (1; 3)           | 0 (0; 0) ¶            | 2 (1; 4)          | 0 (0; 0) ¶           | 2 (1; 4)          | 0 (0; 0) ¶            | 2 (1; 4)          |
| IMV days, median, (IQR)†                                  | 13 (8; 25)            | 14 (9; 26)         | 12.5 (7; 26)          | 14 (8; 32.3)      | 13 (7; 26)           | 14.5 (8; 37)      | 20 (11; 30.5)         | 11 (7.7; 17)      |
| ICU days, median, (IQR)†                                  | 18 (11; 32.7) ¶       | 22 (13; 35.7)      | 17 (10; 33)<br>¶      | 25 (14; 45.7)     | 15.5 (9; 30) ¶       | 24 (12; 50)       | 29 (16; 36)           | 19 (16; 26.7)     |
| Prone position, n (%)                                     | 907 (79.5)            | 321 (75.3)         | 225 (69.1)<br>¶       | 305 (79.6)        | 101 (72.6)           | 125 (79.6)        | 18 (90)               | 19 (79.1)         |
| ECMO, n (%)                                               | 21 (1.8)              | 12 (2.7)           | 3 (0.8) ¶             | 16 (4.1)          | 1 (0.7)              | 2 (1.2)           | 1 (5)                 | 1 (4.1)           |
| Neuromuscular blockade, n (%)                             | 995 (86.6)            | 360 (83.9)         | 298 (81.2)            | 312 (81.8)        | 120 (86.3)           | 136 (86.6)        | 14 (70)               | 20 (83.3)         |
| ICU mortality, n (%)                                      | 436 (37.9)            | 143 (33.2)         | 113 (30.6)<br>¶       | 147 (38.3)        | 39 (28)              | 50 (31.8)         | 3 (15)                | 6 (25)            |
| Hospital mortality, n (%)                                 | 462 (40.2)<br>¶       | 148 (34.4)         | 122 (33) ¶            | 157 (40.9)        | 47 (33.8)            | 59 (37.5)         | 3 (15)                | 6 (25)            |
| 90-day mortality, n (%)                                   | 457 (42.5)<br>¶       | 147 (35)           | 122 (37) ¶            | 155 (44.6)        | 46 (37.1)            | 59 (42.4)         | 4 (30.7)              | 6 (40)            |

Early intubation is considered as  $\leq 24$  hours and delayed intubation, as  $> 24$  hours from ICU

admission. Definition of abbreviations: ECMO: extracorporeal membrane oxygenation; HFNC: high-flow nasal cannula; ICU: intensive care unit; IMV: invasive mechanical ventilation; IQR: interquartile range; NIV: non-invasive ventilation. Percentages calculated with non-missing data only. Fifty-five patients from the general cohort were not included in this analysis as they did not belong to any of the four waves. \*High-flow nasal cannula with or without NIV; \*\* NIV with or without high-flow nasal cannula. \* and \*\* received at least one session of NIV and/or high-flow nasal cannula since hospital admission before intubation. † Analysed only in survivors. ¶  $p < 0.05$  vs. late intubation.

### Supplementary Table S7

Characteristics and outcomes of critically ill patients with COVID-19 receiving early or delayed intubation depending on prior use of high-flow nasal cannula or non-invasive ventilation (unmatched population).

| Variables                                                          | High-flow nasal cannula<br>N = 1082 |                                    |                | Non-invasive mechanical<br>ventilation with or without<br>high-flow nasal cannula<br>N = 963 |                                    |                  |
|--------------------------------------------------------------------|-------------------------------------|------------------------------------|----------------|----------------------------------------------------------------------------------------------|------------------------------------|------------------|
|                                                                    | Early<br>intubation<br>(n = 522)    | Delayed<br>intubation<br>(n = 560) | <i>p value</i> | Early<br>intubation<br>(n = 588)                                                             | Delayed<br>intubation<br>(n = 375) | <i>p value</i>   |
| Age, years,<br>median, (IQR)                                       | 65<br>(56; 72)                      | 63<br>(54; 70)                     | <b>0.01</b>    | 64<br>(56; 70)                                                                               | 64<br>(56; 72)                     | 0.46             |
| Sex, female, n (%)                                                 | 163 (31.2)                          | 152 (27.1)                         | 0.14           | 155 (26.3)                                                                                   | 105 (28)                           | 0.60             |
| BMI, Kg/m <sup>2</sup> ,<br>median, (IQR)                          | 28.6 (25.9;<br>31.9)                | 28.7 (26.1;<br>32.4)               | 0.57           | 29.3<br>(25.9;<br>32.7)                                                                      | 29.5<br>(26.7;<br>32.6)            | 0.17             |
| Hypertension, n<br>(%)                                             | 248 (47.5)                          | 280 (50)                           | 0.42           | 298 (50.6)                                                                                   | 209 (55.7)                         | 0.12             |
| Diabetes mellitus,<br>n (%)                                        | 128 (24.5)                          | 137 (24.4)                         | 1              | 144 (24.4)                                                                                   | 108 (28.8)                         | 0.15             |
| Chronic cardiac<br>failure, n (%)                                  | 57 (10.9)                           | 58 (10.3)                          | 0.76           | 61 (10.3)                                                                                    | 64 (17)                            | <b>0.003</b>     |
| COPD, n (%)                                                        | 48 (9.2)                            | 55 (9.8)                           | 0.75           | 46 (7.8)                                                                                     | 34 (9)                             | 0.55             |
| Immunodepression,<br>n (%)                                         | 91 (17.4)                           | 119 (21.2)                         | 0.12           | 108 (18.3)                                                                                   | 98 (26.1)                          | <b>0.005</b>     |
| Received<br>corticosteroids, n<br>(%)                              | 447 (85.8)                          | 498 (90.3)                         | <b>0.02</b>    | 519 (88.5)                                                                                   | 340 (90.9)                         | 0.28             |
| <b>Clinical characteristics at hospital admission</b>              |                                     |                                    |                |                                                                                              |                                    |                  |
| PaO <sub>2</sub> /F <sub>I</sub> O <sub>2</sub> , median,<br>(IQR) | 242.8<br>(178.7;<br>298.8)          | 215.2<br>(118.3;<br>283.4)         | <b>0.001</b>   | 222.5<br>(149.6;<br>280.9)                                                                   | 150<br>(89; 252.2)                 | <b>&lt;0.001</b> |
| Respiratory rate,<br>respiration per                               | 24 (20; 28)                         | 24 (20; 30)                        | 0.19           | 24 (20; 30)                                                                                  | 27 (22; 32)                        | <b>0.005</b>     |

|                                                                   |                   |                   |                  |                   |                   |                  |
|-------------------------------------------------------------------|-------------------|-------------------|------------------|-------------------|-------------------|------------------|
| minute, median, (IQR)                                             |                   |                   |                  |                   |                   |                  |
| PaCO <sub>2</sub> , mmHg, median, (IQR)                           | 34 (30.1; 38.5)   | 34 (30; 38)       | 0.84             | 33 (30; 38)       | 34.2 (30.3; 38)   | 0.12             |
| pH, median, (IQR)                                                 | 7.45 (7.41; 7.47) | 7.45 (7.41; 7.47) | 0.66             | 7.45 (7.41; 7.47) | 7.44 (7.41; 7.48) | 0.76             |
| CRP, mg/dL, median, (IQR)                                         | 12.3 (7; 19.7)    | 11.9 (6.6; 20.6)  | 0.96             | 13.3 (6.9; 21.2)  | 13.5 (8.1; 22.2)  | 0.16             |
| Lymphocyte count, 10 <sup>9</sup> cells/L, median, (IQR)          | 0.8 (0.6; 1.1)    | 0.8 (0.6; 1.1)    | 0.67             | 0.8 (0.58; 1.1)   | 0.73 (0.51; 1.02) | 0.17             |
| Platelets, 10 <sup>9</sup> cells/L, median, (IQR)                 | 179 (138; 229)    | 182 (142; 238)    | 0.27             | 184 (148; 236)    | 193 (147; 245)    | 0.38             |
| D-dimer, mg/L, median, (IQR)                                      | 0.62 (0.37; 1.09) | 0.57 (0.34; 1.08) | 0.42             | 0.66 (0.42; 1.08) | 0.69 (0.39; 1.25) | 0.78             |
| Creatinine, mg/dL, median, (IQR)                                  | 0.98 (0.79; 1.17) | 0.96 (0.79; 1.22) | 0.70             | 0.97 (0.8; 1.2)   | 0.93 (0.76; 1.2)  | 0.25             |
| Lactate, mg/dL, median, (IQR)                                     | 12.6 (9; 17.3)    | 13.3 (9.9; 17.9)  | 0.61             | 13.5 (9.9; 18)    | 13.4 (9.9; 16.5)  | 0.59             |
| <b>Disease chronology</b>                                         |                   |                   |                  |                   |                   |                  |
| Time since symptom onset to ICU admission, days, median, (IQR)    | 9 (7; 11)         | 8 (6; 10)         | <b>0.026</b>     | 10 (6; 12)        | 9 (7; 11)         | 0.33             |
| Patients spending >2 days in hospital before ICU admission, n (%) | 293 (56.1)        | 196 (35)          | <b>&lt;0.001</b> | 371 (63.1)        | 127 (33.8)        | <b>&lt;0.001</b> |
| Time since symptom onset to IMV, days, median, (IQR)              | 9 (7; 12)         | 11 (8; 14)        | <b>&lt;0.001</b> | 10 (8; 14)        | 11 (9; 15)        | <b>&lt;0.001</b> |
| Time since hospital admission to IMV, days, median, (IQR)         | 3 (2; 5)          | 4 (2; 6)          | <b>&lt;0.001</b> | 3 (2; 6)          | 4 (2; 7)          | <b>&lt;0.001</b> |
| Time since ICU admission to IMV, days, median, (IQR)              | 0 (0; 0)          | 2 (1; 3)          | <b>&lt;0.001</b> | 0 (0; 0)          | 2 (1; 4)          | <b>&lt;0.001</b> |
| <b>Waves</b>                                                      |                   |                   |                  |                   |                   |                  |
| 1 <sup>st</sup> wave, n (%)                                       | 307 (58.8)        | 211 (37.6)        | <b>&lt;0.001</b> | 413 (70.2)        | 153 (40.8)        | <b>&lt;0.001</b> |

|                               |             |             |                  |               |                |                  |
|-------------------------------|-------------|-------------|------------------|---------------|----------------|------------------|
| 2 <sup>nd</sup> wave, n (%)   | 134 (25.6)  | 226 (40.3)  | <b>&lt;0.001</b> | 118 (20)      | 136 (36.2)     | <b>&lt;0.001</b> |
| 3 <sup>rd</sup> wave, n (%)   | 57 (10.9)   | 85 (15.1)   | <b>0.03</b>      | 48 (8.1)      | 66 (17.6)      | <b>&lt;0.001</b> |
| 4 <sup>th</sup> wave, n (%)   | 12 (2.3)    | 16 (2.8)    | 0.7              | 8 (1.3)       | 8 (2.1)        | 0.44             |
| <b>Outcomes</b>               |             |             |                  |               |                |                  |
| IMV days, median, (IQR) †     | 13 (8; 25)  | 13 (8; 29)  | 0.92             | 12.5 (8; 24)  | 15.5 (9; 28.7) | <b>0.02</b>      |
| ICU days, median, (IQR) †     | 18 (11; 33) | 22 (13; 39) | <b>0.001</b>     | 17 (10; 29.2) | 24 (14; 41)    | <b>&lt;0.001</b> |
| Prone position, n (%)         | 382 (73.3)  | 429 (76.8)  | 0.18             | 496 (84.6)    | 301 (80.4)     | 0.09             |
| ECMO, n (%)                   | 9 (1.7)     | 12 (2.1)    | 0.66             | 13 (2.2)      | 18 (4.8)       | <b>0.03</b>      |
| Neuromuscular blockade, n (%) | 432 (82.9)  | 480 (85.8)  | 0.2              | 509 (86.7)    | 304 (81.5)     | <b>0.03</b>      |
| ICU mortality, n (%)          | 143 (27.3)  | 176 (31.4)  | 0.16             | 187 (31.8)    | 145 (38.6)     | <b>0.03</b>      |
| Hospital mortality, n (%)     | 183 (32.6)  | 157 (30)    | 0.36             | 204 (34.6)    | 159 (42.4)     | <b>0.01</b>      |
| 90-day mortality, n (%)       | 156 (33.1)  | 183 (36.4)  | 0.28             | 205 (36.9)    | 156 (44.9)     | <b>0.01</b>      |

Early intubation is considered as  $\leq 24$  hours and delayed intubation, as  $> 24$  hours from ICU admission. Definition of abbreviations: BMI: body mass index; COPD: chronic obstructive pulmonary disease; CRP: C-reactive protein; ECMO: extracorporeal membrane oxygenation; ICU: intensive care unit; IMV: invasive mechanical ventilation; IQR: interquartile range; PaCO<sub>2</sub>: partial pressure of CO<sub>2</sub> in the arterial blood. Percentages calculated with non-missing data only. † Analysed only in survivors. Boldface entries indicate statistical significance.

### Supplementary Table S8

Characteristics and outcomes of critically ill patients with COVID-19 receiving early or delayed intubation depending on prior use of high-flow nasal cannula or non-invasive ventilation (48-hour timepoint analysis, unmatched population).

| Variables                                                          | High-flow nasal cannula<br>N = 1082 |                                    |                | Non-invasive mechanical<br>ventilation with or without<br>high-flow nasal cannula<br>N = 963 |                                    |                |
|--------------------------------------------------------------------|-------------------------------------|------------------------------------|----------------|----------------------------------------------------------------------------------------------|------------------------------------|----------------|
|                                                                    | Early<br>intubation<br>(n = 795)    | Delayed<br>intubation<br>(n = 287) | <i>p value</i> | Early<br>intubation<br>(n = 727)                                                             | Delayed<br>intubation<br>(n = 236) | <i>p value</i> |
| Age, years,<br>median, (IQR)                                       | 64<br>(56; 71)                      | 63<br>(53; 70)                     | 0.07           | 64<br>(56; 70)                                                                               | 64<br>(56; 71)                     | 0.43           |
| Sex, female, n (%)                                                 | 234 (29.4)                          | 81 (28.2)                          | 0.76           | 196 (26.9)                                                                                   | 64 (27.1)                          | 1              |
| BMI, Kg/m <sup>2</sup> ,<br>median, (IQR)                          | 28.7 (26;<br>32.2)                  | 28.4 (25.7;<br>31.9)               | 0.40           | 29.4<br>(26.2; 33)                                                                           | 29.5<br>(26.2; 32)                 | 0.28           |
| Hypertension, n<br>(%)                                             | 382 (48)                            | 146 (50.8)                         | 0.49           | 378 (51.9)                                                                                   | 129 (54.6)                         | 0.5            |
| Diabetes mellitus,<br>n (%)                                        | 192 (24.1)                          | 73 (25.4)                          | 0.68           | 189 (26)                                                                                     | 63 (26.6)                          | 0.86           |
| Chronic cardiac<br>failure, n (%)                                  | 89 (11.1)                           | 26 (9)                             | 0.37           | 85 (11.6)                                                                                    | 40 (16.9)                          | <b>0.04</b>    |
| COPD, n (%)                                                        | 77 (9.6)                            | 26 (9)                             | 0.81           | 55 (7.5)                                                                                     | 25 (10.5)                          | 0.17           |
| Immunodepression,<br>n (%)                                         | 140 (17.6)                          | 70 (24.3)                          | <b>0.01</b>    | 138 (18.9)                                                                                   | 68 (28.8)                          | <b>0.002</b>   |
| Received<br>corticosteroids, n<br>(%)                              | 689 (87.2)                          | 256 (90.7)                         | 0.13           | 637 (87.8)                                                                                   | 222 (94.4)                         | <b>0.003</b>   |
| <b>Clinical characteristics at hospital admission</b>              |                                     |                                    |                |                                                                                              |                                    |                |
| PaO <sub>2</sub> /F <sub>I</sub> O <sub>2</sub> , median,<br>(IQR) | 230<br>(152.5;<br>292.3)            | 225<br>(129.8;<br>285.9)           | 0.45           | 203.3<br>(119.5;<br>269.7)                                                                   | 163.1<br>(98.2;<br>261.1)          | 0.07           |
| Respiratory rate,<br>respiration per                               | 24 (20; 30)                         | 24 (20; 30)                        | 0.82           | 25 (20; 32)                                                                                  | 28 (22; 32)                        | 0.11           |

|                                                                   |                   |                   |                  |                   |                   |                  |
|-------------------------------------------------------------------|-------------------|-------------------|------------------|-------------------|-------------------|------------------|
| minute, median, (IQR)                                             |                   |                   |                  |                   |                   |                  |
| PaCO <sub>2</sub> , mmHg, median, (IQR)                           | 34 (30.2; 38.5)   | 33.4 (30; 36.6)   | 0.08             | 33 (30; 38)       | 34 (30.4; 37.7)   | 0.36             |
| pH, median, (IQR)                                                 | 7.45 (7.41; 7.47) | 7.45 (7.41; 7.47) | 0.43             | 7.45 (7.41; 7.47) | 7.44 (7.41; 7.48) | 0.54             |
| CRP, mg/dL, median, (IQR)                                         | 12.3 (7; 20.2)    | 11.3 (6.1; 20.8)  | 0.40             | 13.5 (7.1; 21.4)  | 13.4 (8; 22)      | 0.56             |
| Lymphocyte count, 10 <sup>9</sup> cells/L, median, (IQR)          | 0.8 (0.6; 1.1)    | 0.8 (0.6; 1.1)    | 0.68             | 0.78 (0.57; 1.09) | 0.73 (0.52; 1.02) | 0.4              |
| Platelets, 10 <sup>9</sup> cells/L, median, (IQR)                 | 180 (140; 233)    | 183 (140; 237)    | 0.91             | 185 (149; 237)    | 189 (142; 246)    | 0.84             |
| D-dimer, mg/L, median, (IQR)                                      | 0.61 (0.36; 1.2)  | 0.56 (0.33; 1)    | 0.64             | 0.68 (0.41; 1.1)  | 0.69 (0.39; 1.24) | 0.79             |
| Creatinine, mg/dL, median, (IQR)                                  | 0.97 (0.79; 1.17) | 0.98 (0.79; 1.28) | 0.20             | 0.96 (0.8; 1.2)   | 0.93 (0.74; 1.1)  | 0.12             |
| Lactate, mg/dL, median, (IQR)                                     | 12.6 (9.3; 17.1)  | 13.5 (9.9; 18)    | 0.29             | 13.5 (9.9; 18)    | 11.7 (9; 15.7)    | <b>0.004</b>     |
| <b>Disease chronology</b>                                         |                   |                   |                  |                   |                   |                  |
| Time since symptom onset to ICU admission, days, median, (IQR)    | 9 (7; 12)         | 8 (7; 11)         | 0.07             | 10 (7; 13)        | 8 (6; 11)         | <b>&lt;0.001</b> |
| Patients spending >2 days in hospital before ICU admission, n (%) | 387 (48.6)        | 102 (35.5)        | <b>&lt;0.001</b> | 414 (56.9)        | 84 (35.5)         | <b>&lt;0.001</b> |
| Time since symptom onset to IMV, days, median, (IQR)              | 9 (7; 12)         | 12 (10; 15)       | <b>&lt;0.001</b> | 10 (8; 13)        | 12 (10; 17)       | <b>&lt;0.001</b> |
| Time since hospital admission to IMV, days, median, (IQR)         | 3 (1; 5)          | 5 (3; 8)          | <b>&lt;0.001</b> | 3 (2; 5)          | 6 (3; 9)          | <b>&lt;0.001</b> |
| Time since ICU admission to IMV, days, median, (IQR)              | 0 (0; 1)          | 3 (2; 4)          | <b>&lt;0.001</b> | 0 (0; 0)          | 3 (2; 5)          | <b>&lt;0.001</b> |
| <b>Waves</b>                                                      |                   |                   |                  |                   |                   |                  |

|                               |             |             |                  |               |                |                  |
|-------------------------------|-------------|-------------|------------------|---------------|----------------|------------------|
| 1 <sup>st</sup> wave, n (%)   | 426 (53.5)  | 92 (32)     | <b>&lt;0.001</b> | 487 (66.9)    | 79 (33.4)      | <b>&lt;0.001</b> |
| 2 <sup>nd</sup> wave, n (%)   | 236 (29.6)  | 226 (40.3)  | <b>&lt;0.001</b> | 159 (21.8)    | 95 (40.2)      | <b>&lt;0.001</b> |
| 3 <sup>rd</sup> wave, n (%)   | 90 (11.3)   | 52 (18.1)   | <b>0.04</b>      | 69 (9.4)      | 45 (19)        | <b>&lt;0.001</b> |
| 4 <sup>th</sup> wave, n (%)   | 20 (2.5)    | 8 (2.7)     | 0.82             | 10 (1.3)      | 6 (2.5)        | 0.24             |
| <b>Outcomes</b>               |             |             |                  |               |                |                  |
| IMV days, median, (IQR) †     | 13 (8; 26)  | 13 (7; 29)  | 0.82             | 12.5 (8; 24)  | 15.5 (9; 28.7) | <b>0.02</b>      |
| ICU days, median, (IQR) †     | 18 (12; 35) | 24 (15; 41) | <b>0.001</b>     | 17 (10; 29.2) | 24 (14; 41)    | <b>&lt;0.001</b> |
| Prone position, n (%)         | 585 (73.7)  | 226 (79)    | 0.08             | 600 (82.8)    | 197 (83.4)     | 0.92             |
| ECMO, n (%)                   | 13 (1.6)    | 8 (2.7)     | 0.22             | 16 (2.2)      | 15 (6.3)       | <b>0.004</b>     |
| Neuromuscular blockade, n (%) | 668 (84.1)  | 244 (85.3)  | 0.70             | 624 (85.9)    | 189 (80.7)     | 0.06             |
| ICU mortality, n (%)          | 223 (28)    | 96 (33.4)   | 0.09             | 226 (31)      | 106 (44.9)     | <b>&lt;0.001</b> |
| Hospital mortality, n (%)     | 240 (30.1)  | 100 (34.8)  | 0.15             | 248 (34.1)    | 115 (48.7)     | <b>&lt;0.001</b> |
| 90-day mortality, n (%)       | 239 (33.5)  | 100 (38.3)  | 0.17             | 247 (36.1)    | 114 (52)       | <b>&lt;0.01</b>  |

Early intubation is considered as  $\leq 48$  hours and delayed intubation, as  $> 48$  hours from ICU admission. Definition of abbreviations: BMI: body mass index; COPD: chronic obstructive pulmonary disease; CRP: C-reactive protein; ECMO: extracorporeal membrane oxygenation; ICU: intensive care unit; IMV: invasive mechanical ventilation; IQR: interquartile range; PaCO<sub>2</sub>: partial pressure of CO<sub>2</sub> in the arterial blood. Percentages calculated with non-missing data only. † Analysed only in survivors. Boldface entries indicate statistical significance.

### Supplementary Table S9

Characteristics and outcomes of critically ill patients with COVID-19 receiving early or delayed intubation depending on prior use of high-flow nasal cannula or non-invasive ventilation (48-hour timepoint analysis, matched population).

| Variables                                                          | High-flow nasal cannula<br>N = 230 |                                    |                | Non-invasive mechanical<br>ventilation with or without<br>high-flow nasal cannula<br>N = 236 |                                    |                |
|--------------------------------------------------------------------|------------------------------------|------------------------------------|----------------|----------------------------------------------------------------------------------------------|------------------------------------|----------------|
|                                                                    | Early<br>intubation<br>(n = 115)   | Delayed<br>intubation<br>(n = 115) | <i>p value</i> | Early<br>intubation<br>(n = 118)                                                             | Delayed<br>intubation<br>(n = 118) | <i>p value</i> |
| Age, years,<br>median, (IQR)                                       | 60<br>(52; 68)                     | 64<br>(54; 71)                     | 0.08           | 63<br>(55; 70)                                                                               | 64<br>(58; 72)                     | 0.37           |
| Sex, female, n (%)                                                 | 38 (33)                            | 35 (30)                            | 0.77           | 35 (29.6)                                                                                    | 32 (27.1)                          | 0.77           |
| BMI, Kg/m <sup>2</sup> ,<br>median, (IQR)                          | 29.3 (27.1;<br>33.5)               | 28 (25.7;<br>31.9)                 | <b>0.03</b>    | 31.1<br>(28.1;<br>35.7)                                                                      | 29.1<br>(26.1; 32)                 | <b>0.001</b>   |
| Hypertension, n<br>(%)                                             | 58 (50.4)                          | 56 (48.7)                          | 0.89           | 65 (55)                                                                                      | 64 (54.2)                          | 1              |
| Diabetes mellitus,<br>n (%)                                        | 29 (25.2)                          | 29 (25.2)                          | 1              | 37 (31.3)                                                                                    | 33 (27.9)                          | 0.66           |
| Chronic cardiac<br>failure, n (%)                                  | 13 (11.3)                          | 15 (13)                            | 0.84           | 14 (11.8)                                                                                    | 14 (14.4)                          | 0.70           |
| COPD, n (%)                                                        | 10 (8.7)                           | 9 (7.8)                            | 1              | 9 (7.6)                                                                                      | 17 (14.4)                          | 0.14           |
| Immunodepression,<br>n (%)                                         | 20 (17.3)                          | 20 (17.3)                          | 1              | 26 (22)                                                                                      | 26 (22)                            | 1              |
| Received<br>corticosteroids, n<br>(%)                              | 107 (93)                           | 106 (92.1)                         | 1              | 110 (93.2)                                                                                   | 111 (94)                           | 1              |
| <b>Clinical characteristics at hospital admission</b>              |                                    |                                    |                |                                                                                              |                                    |                |
| PaO <sub>2</sub> /F <sub>1</sub> O <sub>2</sub> , median,<br>(IQR) | 214.2<br>(149;<br>280.3)           | 193.3<br>(132;<br>275.2)           | 0.48           | 173.7<br>(95.8;<br>238.3)                                                                    | 164.2<br>(98.7;<br>261.4)          | 0.71           |
| Respiratory rate,<br>respiration per                               | 24 (20; 29)                        | 25 (20; 31)                        | 0.11           | 27 (22; 35)                                                                                  | 28 (22; 32)                        | 0.61           |

|                                                                   |                   |                   |                  |                   |                   |                  |
|-------------------------------------------------------------------|-------------------|-------------------|------------------|-------------------|-------------------|------------------|
| minute, median, (IQR)                                             |                   |                   |                  |                   |                   |                  |
| PaCO <sub>2</sub> , mmHg, median, (IQR)                           | 34 (31; 37)       | 33 (30; 37)       | 0.19             | 33 (30; 38)       | 33 (29; 38)       | 0.79             |
| pH, median, (IQR)                                                 | 7.45 (7.42; 7.47) | 7.45 (7.43; 7.48) | 0.89             | 7.45 (7.41; 7.48) | 7.46 (7.42; 7.48) | 0.45             |
| CRP, mg/dL, median, (IQR)                                         | 12.7 (8.2; 21.4)  | 13 (7.3; 21.2)    | 0.71             | 14.1 (7.8; 20.8)  | 13.6 (8.3; 22.2)  | 0.36             |
| Lymphocyte count, 10 <sup>9</sup> cells/L, median, (IQR)          | 0.8 (0.6; 1)      | 0.8 (0.6; 1)      | 0.60             | 0.8 (0.6; 1.08)   | 0.8 (0.6; 1.02)   | 0.92             |
| Platelets, 10 <sup>9</sup> cells/L, median, (IQR)                 | 191 (156; 243)    | 182 (146; 232)    | 0.49             | 187 (150; 231)    | 196 (149; 254)    | 0.33             |
| D-dimer, mg/L, median, (IQR)                                      | 0.56 (0.41; 0.9)  | 0.54 (0.38; 0.97) | 0.84             | 0.65 (0.4; 1)     | 0.69 (0.39; 1.39) | 0.37             |
| Creatinine, mg/dL, median, (IQR)                                  | 0.95 (0.78; 1.17) | 0.94 (0.79; 1.23) | 0.99             | 0.99 (0.8; 1.28)  | 0.91 (0.71; 1.11) | <b>0.05</b>      |
| Lactate, mg/dL, median, (IQR)                                     | 12.6 (9.7; 16.2)  | 12.6 (9; 17.1)    | 0.95             | 13.4 (10.1; 16.2) | 11.4 (9; 14.4)    | <b>0.04</b>      |
| <b>Disease chronology</b>                                         |                   |                   |                  |                   |                   |                  |
| Time since symptom onset to ICU admission, days, median, (IQR)    | 8 (6; 11)         | 8 (6; 10)         | 0.66             | 8 (6; 11)         | 8 (7; 12)         | 0.75             |
| Patients spending >2 days in hospital before ICU admission, n (%) | 31 (26.9)         | 27 (23.4)         | 0.64             | 39 (33)           | 37 (31.3)         | 0.88             |
| Time since symptom onset to IMV, days, median, (IQR)              | 9 (6; 11)         | 11 (9; 14)        | <b>&lt;0.001</b> | 9 (7; 13)         | 12 (9; 16)        | <b>&lt;0.001</b> |
| Time since hospital admission to IMV, days, median, (IQR)         | 2 (1; 3)          | 4 (3; 6)          | <b>&lt;0.001</b> | 2 (1; 3)          | 5.5 (3; 8)        | <b>&lt;0.001</b> |
| Time since ICU admission to IMV, days, median, (IQR)              | 0 (0; 0)          | 3 (2; 4)          | <b>&lt;0.001</b> | 0 (0; 1)          | 3 (2; 5)          | <b>&lt;0.001</b> |
| <b>Waves</b>                                                      |                   |                   |                  |                   |                   |                  |
| 1 <sup>st</sup> wave, n (%)                                       | 54 (46.9)         | 41 (35.6)         | 0.10             | 53 (44.9)         | 43 (36.4)         | 0.23             |
| 2 <sup>nd</sup> wave, n (%)                                       | 39 (33.9)         | 51 (44.3)         | 0.13             | 34 (28.8)         | 55 (46.6)         | <b>0.007</b>     |
| 3 <sup>rd</sup> wave, n (%)                                       | 19 (16.5)         | 19 (16.5)         | 1                | 29 (24.5)         | 20 (16.9)         | 0.57             |
| 4 <sup>th</sup> wave, n (%)                                       | 3 (2.6)           | 4 (3.4)           | 1                | 2 (1.6)           | 0 (0)             | 0.49             |
| <b>Outcomes</b>                                                   |                   |                   |                  |                   |                   |                  |
| IMV days, median, (IQR) †                                         | 13 (9; 25)        | 15 (8; 32)        | 0.61             | 12 (8; 24)        | 19 (8; 30)        | 0.28             |

|                               |             |             |              |             |             |             |
|-------------------------------|-------------|-------------|--------------|-------------|-------------|-------------|
| ICU days, median, (IQR) †     | 18 (12; 35) | 27 (18; 46) | <b>0.003</b> | 21 (12; 31) | 29 (15; 45) | <b>0.02</b> |
| Prone position, n (%)         | 82 (71.3)   | 96 (83.4)   | <b>0.04</b>  | 97 (82.9)   | 98 (83)     | 1           |
| ECMO, n (%)                   | 2 (1.7)     | 3 (2.6)     | 1            | 1 (0.8)     | 6 (5)       | 0.11        |
| Neuromuscular blockade, n (%) | 93 (80.8)   | 98 (85.2)   | 0.48         | 106 (90.6)  | 104 (88.1)  | 0.67        |
| ICU mortality, n (%)          | 31 (21)     | 48 (32.6)   | <b>0.003</b> | 35 (29.6)   | 53 (44.9)   | <b>0.02</b> |
| Hospital mortality, n (%)     | 22 (19.1)   | 43 (37.3)   | <b>0.003</b> | 36 (30.5)   | 55 (46.6)   | <b>0.01</b> |
| 90-day mortality, n (%)       | 31 (23.8)   | 51 (37.7)   | <b>0.01</b>  | 37 (33.9)   | 54 (48.2)   | <b>0.04</b> |

Early intubation is considered as  $\leq 48$  hours and delayed intubation, as  $> 48$  hours from ICU admission. Definition of abbreviations: BMI: body mass index; COPD: chronic obstructive pulmonary disease; CRP: C reactive protein; ECMO: extracorporeal membrane oxygenation; ICU: intensive care unit; IMV: invasive mechanical ventilation; IQR: interquartile range; and PaCO<sub>2</sub>: partial pressure of CO<sub>2</sub> in the arterial blood. Percentages calculated with non-missing data only. Patients included in the subgroup analysis received at least one session of NIV and/or HFNC before intubation. Variables used to perform PS matching included age, sex, respiratory rate at hospital admission, PaO<sub>2</sub>/F<sub>I</sub>O<sub>2</sub> at hospital admission (categorised as  $>300$  mmHg;  $200 \text{ mmHg} < \text{PaO}_2/\text{F}_I\text{O}_2 \leq 300$  mmHg;  $100 \text{ mmHg} < \text{PaO}_2/\text{F}_I\text{O}_2 \leq 200$  mmHg;  $\text{PaO}_2/\text{F}_I\text{O}_2 \leq 100$  mmHg), days between hospital and ICU admission (categorised as  $\leq$  or  $> 2$  days), chronic immunosuppression, corticosteroid treatment and COVID-19 wave. After excluding patients with missing values, we had a population of 455 patients treated only with HFNC and 396 for patients with NIV +/- HFNC. Table 5 in the supplemental material shows standardised mean differences in baseline covariates from the matched population. † Analysed only in survivors. Boldface entries indicate statistical significance.

### Supplementary Table S10

Gas exchange, mechanical ventilation parameters and respiratory mechanics of critically ill patients with COVID-19 receiving either early or delayed intubation (matched population).

| Variables                                                            | Early                | Delayed              | <i>p value</i> |
|----------------------------------------------------------------------|----------------------|----------------------|----------------|
|                                                                      | intubation           | intubation           |                |
|                                                                      | N = 307              | N = 307              |                |
| PaO <sub>2</sub> /F <sub>I</sub> O <sub>2</sub> , median, (IQR)      | 109<br>(79; 156)     | 112<br>(79; 163)     | 0.78           |
| Ventilatory ratio, median, (IQR)                                     | 1.61<br>(1.36; 1.98) | 1.62<br>(1.36; 2.06) | 0.59           |
| Tidal volume /PBW, median, (IQR)                                     | 7.1<br>(6.32; 8.17)  | 6.86<br>(6.18; 7.56) | <b>0.01</b>    |
| Respiratory rate, rpm, median, (IQR)                                 | 20<br>(18; 24)       | 21<br>(18; 24)       | 0.73           |
| PEEP, cmH <sub>2</sub> O, median, (IQR)                              | 12<br>(10; 14)       | 12<br>(10; 14)       | 0.80           |
| Peak inspiratory pressure, cmH <sub>2</sub> O, median, (IQR)         | 31<br>(28; 36)       | 32<br>(29; 36)       | 0.27           |
| Positive end-inspiratory pressure, cmH <sub>2</sub> O, median, (IQR) | 24<br>(21; 28)       | 25<br>(23; 28)       | <b>0.01</b>    |
| Driving pressure, cmH <sub>2</sub> O, median, (IQR)                  | 12<br>(9; 15)        | 13<br>(10; 15)       | <b>0.03</b>    |

Early intubation is considered as  $\leq 24$  hours and delayed intubation, as  $> 24$  hours from ICU admission. Definition of abbreviations: IQR: interquartile range; PBW: predicted body weight; PEEP: positive end-expiratory pressure; RPM: respirations per minute. Percentages calculated with non-missing data only. Boldface entries indicate statistical significance.

### Supplementary Table S11

Gas exchange, mechanical ventilation parameters and respiratory mechanics of critically ill patients with COVID-19 receiving either early or delayed intubation (48-hour timepoint analysis, matched population).

| Variables                                                            |                      |                        |                |
|----------------------------------------------------------------------|----------------------|------------------------|----------------|
|                                                                      | Early                | Delayed                |                |
|                                                                      | intubation           | intubation             | <i>p value</i> |
|                                                                      | N = 229              | N = 229                |                |
| PaO <sub>2</sub> /F <sub>I</sub> O <sub>2</sub> , median, (IQR)      | 125<br>(83.3; 178.3) | 101.8<br>(75.6; 148.7) | <b>0.007</b>   |
| Ventilatory ratio, median, (IQR)                                     | 1.68<br>(1.39; 2.19) | 1.59<br>(1.36; 1.92)   | 0.13           |
| Tidal volume /PBW, median, (IQR)                                     | 7.02<br>(6.30; 7.79) | 6.81<br>(6.18; 7.39)   | <b>0.01</b>    |
| Respiratory rate, rpm, median, (IQR)                                 | 20<br>(18; 24)       | 22<br>(20; 24)         | 0.13           |
| PEEP, cmH <sub>2</sub> O, median, (IQR)                              | 12<br>(10; 14)       | 12<br>(10; 14)         | 0.32           |
| Peak inspiratory pressure, cmH <sub>2</sub> O, median, (IQR)         | 32<br>(29; 36)       | 32<br>(29; 37)         | 0.35           |
| Positive end-inspiratory pressure, cmH <sub>2</sub> O, median, (IQR) | 25<br>(22; 28)       | 26<br>(23; 28)         | 0.16           |
| Driving pressure, cmH <sub>2</sub> O, median, (IQR)                  | 12<br>(10; 15)       | 13<br>(10; 16)         | 0.14           |

Early intubation is considered as  $\leq 48$  hours and delayed intubation, as  $> 48$  hours from ICU admission. Definition of abbreviations: IQR: interquartile range; PBW: predicted body weight; PEEP: positive end-expiratory pressure; RPM: respirations per minute. Percentages calculated with non-missing data only. Boldface entries indicate statistical significance.
